# Supplementary material
Source: HighWire-hosted journal article supplement (https://bmjopenquality.bmj.com/highwire/filestream/135971/field_highwire_adjunct_files/0/ds3155.docx)
Supplement: ds3155.docx [file ds3155.docx]

**Table 1** Percentage of doctors able to locate guidelines pre- and post-intervention. UGIB, upper gastrointestinal bleed; VTE, venous thromboembolism

|  | **VTE** | **UGIB** | **Antibiotics** |
| --- | --- | --- | --- |
| % found pre- intervention | 55% | 50% | 100% |
| % found post- intervention | 100% | 100% | 100% |

**Table 2** Time taken to find guidelines pre- and post-intervention. UGIB, upper gastrointestinal bleed; VTE, venous thromboembolism

|  | **VTE** | **UGIB** | **Antibiotics** |
| --- | --- | --- | --- |
| Time pre- intervention (sec) | 192.8 | 172 | 4.5 |
| Time post- intervention (sec) | 11.2 | 5.6 | 3.9 |
| Time saved (sec) | 181.8 | 166.4 | 0.6 |

**Table 3** Number of clicks to used to locate guidelines pre-and post-intervention. UGIB, upper gastrointestinal bleed; VTE, venous thromboembolism

|  | **VTE** | **UGIB** | **Antibiotics** |
| --- | --- | --- | --- |
| Clicks pre- intervention | 11.2 | 26.6 | 2.3 |
| Clicks post- intervention | 2.2 | 2.0 | 2.1 |
| Clicks saved | 9.0 | 24.6 | 0.2 |

**Figure 2** Time to guideline pre- and post-intervention. ABX, antibiotics; GI, gastrointestinal; VTE, venous thromboembolism

**Figure 1** Time to guideline pre- and post-intervention. ABX, antibiotics; GI, gastrointestinal; VTE, venous thromboembolism
